# Supplementary material for: Investigating the Effectiveness of Very Low-Calorie Diets and Low-Fat Vegan Diets on Weight and Glycemic Markers in Type 2 Diabetes Mellitus: A Systematic Review and Meta-Analysis
Source: MDPI journal article supplement (doi:10.3390/nu14224870), 2022-11-17
Supplement: s1 [file s1]

Supplemental Figure S4

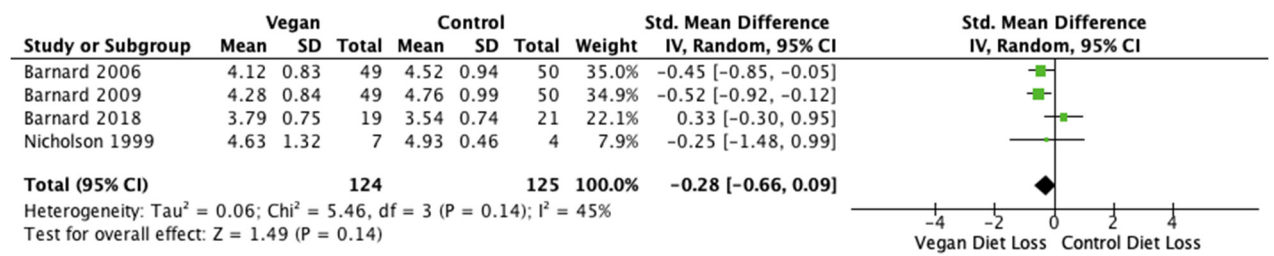

**Figure S4.** Forest plot comparing the reduction in total cholesterol after consumption of low-fat vegan and control diets.
