# Supplementary material for: Investigating the Effectiveness of Very Low-Calorie Diets and Low-Fat Vegan Diets on Weight and Glycemic Markers in Type 2 Diabetes Mellitus: A Systematic Review and Meta-Analysis
Source: MDPI journal article supplement (doi:10.3390/nu14224870), 2022-11-17
Supplement: s1 [file s1]

**Table S1.** Study Characteristics of Included Studies.

| Study                   | Country            | Study Design | Study Duration |           | Intervention diet (I)      | Control diet (C)<br>or not under<br>review      | Number of<br>participants<br>All (I / C) | M/F | Mean Age, years (I / C)                                                             |
|-------------------------|--------------------|--------------|----------------|-----------|----------------------------|-------------------------------------------------|------------------------------------------|-----|-------------------------------------------------------------------------------------|
|                         |                    |              | Intervention   | Follow-up |                            |                                                 |                                          |     |                                                                                     |
| Barnard et al. (2006)   | USA                | RCT          | 22 weeks       | 22 weeks  | LFVD                       | ADA Diet                                        | 99 (49 / 50)                             | M/F | 55.65 (56.7 / 54.6)                                                                 |
| Barnard et al. (2009)   | USA                | RCT          | 74 weeks       | 74 weeks  | LFVD                       | ADA Diet                                        | 99 (49 / 50)                             | M/F | 55.65 (56.7 / 54.6)                                                                 |
| Barnard et al. (2018)   | USA                | RCT          | 20 weeks       | 20 weeks  | LFVD                       | Portion<br>Controlled Diet                      | 40 (19 / 21)                             | M/F | 61 (61 / 61)                                                                        |
| Jackness et al. (2013)  | USA                | NRCT         | 21 days        | 21 days   | VLCD<br>(500kcal/day)      | Roux-En-Y<br>Gastric Bypass<br>(RYGB)           | 25 (14 / 11)                             | NI  | 48.25 (51.9 / 44.6)                                                                 |
| Jazet et al. (2007)     | The<br>Netherlands | BAS          | 17 weeks       | 17 weeks  | VLCD<br>(450 kcal/day)     | No Dietary<br>Intervention                      | 10 (10 <sup>1</sup> )                    | M/F | 55                                                                                  |
| Lee et al. (2016)       | Korea              | RCT          | 12 weeks       | 12 weeks  | LFVD                       | KDA Diet                                        | 93 (47 / 46)                             | M/F | 57.9 (57.5 / 58.3)                                                                  |
| Lim et al. (2011)       | UK                 | SAIT         | 8 weeks        | 12 weeks  | VLCD<br>(600 kcal/day)     | No Dietary<br>Intervention                      | 20 (11 / 9)                              | M/F | 49.6 (49.5 / 49.7)                                                                  |
| Nicholson et al. (1999) | USA                | RCT          | 12 weeks       | 12 weeks  | LFVD                       | Conventional LF<br>Diet                         | 11 (7 / 4)                               | M/F | 55.75 (51 / 60)                                                                     |
| Skrha et al. (2005)     | Czech<br>Republic  | NRPS         | 8 days         | 8 days    | VLCD<br>(600 kcal/day)     | VLCD<br>(600 kcal/day)                          | 18 (9 / 9)                               | M/F | 53.5 (55 / 52)                                                                      |
| Snel et al. (2011)      | Belgium            | RCT          | 4 months       | 18 months | VLCD<br>(450 kcal/day)     | VLCD<br>(450 kcal/day) +<br>Exercise<br>program | 139 (27 / 112)                           | M/F | 57.5 (VLCD = 59, VLCD + Exercise = 56 / Lean<br>controls = 59, Obese controls = 56) |
| Snel et al. (2012)      | Belgium            | BAS          | 18 months      | 18 months | VLCD                       | N/A                                             | 14 (14 <sup>1</sup> )                    | M/F | 53                                                                                  |
| Steven + Taylor (2015)  | UK                 | SAIT         | 8 weeks        | 8 weeks   | VLCD<br>(624 kcal/day)     | N/A                                             | 29 (29 <sup>1</sup> )                    | M/F | 56.85 (52.1 / 61.6)                                                                 |
| Taheri et al. (2020)    | Qatar              | RCT          | 12 months      | 12 months | VLCD<br>(800 kcal/day)     | Standard<br>medical care                        | 147 (70 / 77)                            | M/F | 42.1 (41.9 / 42.3)                                                                  |
| Teeuwisse et al. (2012) | The<br>Netherlands | BAS          | 4 days         | 4 days    | VLCD<br>(450 kcal/day)     | N/A                                             | 10 (10 <sup>1</sup> )                    | M   | 56.8                                                                                |
| Williams et al. (1998)  | USA                | RCT          | 20 weeks       | 20 weeks  | VLCD<br>(400-600 kcal/day) | SBTP (1500-<br>1800kcal/day)                    | 47 (31 / 16)                             | M/F | 51.9 (Control =51.4, 5 Day Intervention= 50.3,<br>1 Day Intervention =54.1          |
| Wing et al. (1991)      | USA                | RCT          | 20 weeks       | 72 weeks  | VLCD<br>(401 kcal/day)     | SBTP (1003-<br>1505kcal/day)                    | 33 (17 / 16)                             | M/F | 51.25 (50.6 / 51.9)                                                                 |

<sup>1</sup> Intervention diet only  
ADA, American diabetes association; BAS, Before-after study; C, Control; I, Intervention; KDA, Korean diabetes association; LF, Low-fat; LFVD, Low-fat vegan diet; NI, No Information; NRCT, Non-randomized control trial; NRPS, Non-Randomized Pilot Study; RCT, Randomized control trial; SAIT, Single arm intervention trial; SBTP, Standard behavior therapy program; VLCD, Very low-calorie diet
